# Supplementary material
Source: publisher site journal article supplement (https://www.dovepress.com/get_supplementary_file.php?f=230892.xlsx)
Supplement: Supplementary file 1 [file get_supplementary_file.php]

## Sheet: TOP DEGs in the 3 datasets
GSE13396	GSE64913	GSE4302
LOC401074	FGFBP1	PRR4
ADAM19	KRT6A	CLCA1
MGC39900	PHACTR3	CST4
COL12A1	CXCL14	SERPINB2
PRG1	CD109	POSTN
SCG5	DNAJC12	CPA3
ZNF85	FKBP5	P2RY14
MSRB3	MUC12	CST1
VGLL3	TPRXL	ITLN1
GPC4	CEACAM5	KIAA1913
LOC440895	SLCO1B3	CDH26
AKAP12	SERPINB5	CRYBB2
CDH2	PTPRH	IGF2BP3
FAM82B	SERPINB4	TP53AP1
MAP1B	GSTT1	PHLDB2
LOC283537	IL1RN	MGC39900
MAN1A1	ADM	LOC133308
IL6	AKR1B10	CEP72
ANPEP	ZBTB16	NUSAP1
THBS2	SERPINB2	MUC5AC
DPYSL4	CLCA1	PHACTR3
GRTP1	SDCBP2	RAB12
TCEAL7	SCEL	COL3A1
LOC389831	PHEX	SLA2
SLIT2	AREG	C14ORF147
LOC389830	SPRR3	MAOA
LOC286297	TCN1	HIST1H2BG
POSTN	PRR4	C22ORF16
KYNU	FOSL1	CKS2
IGF2BP3	PHLDB2	DNAJC12
ELAVL2	PXDN	MSRB3
WNT5A	KRT23	C2ORF32
MFAP5	HS6ST2	TMEM20
LBH	C1ORF178	GRM7
FLJ10781	TFCP2L1	ENSA
SPOCK1	DLG4	AKAP12
IL24	CTSL2	PCAF
ST6GALNAC5	COPZ2	ZMAT4
TRPC1	SERPINB8	PDPN
YPEL2	CEL	HPGD
CLK4	SH3RF2	BIRC5
TMCC1	AREG	ATP10B
PTPRK	IL8RB	RRM2
EIF5A2	S100A10	KIAA1505
HSD17B2	CA12	HIST1H2AG
DISP2	IL1R2	RNASE1
SUPT7L	AADAC	FKBP5
COL5A2	ARL4D	NUDT21
MUC20	TRIM7	DKFZP313A2432
HS3ST2	PTGS2	ASRGL1
CTNNB1	HRASLS	ZMAT3
ZPLD1	TOP2A	GJB2
LOC400642	SDPR	RASSF2
AEBP1	TUBB6	PLEKHA5
C10ORF10	KRT13	BCL2L14
FN1	NGFRAP1L1	ULK4
DKFZP761M1511	CLCNKB	CXCL14
TRIM13	S100A8	GLT28D1
NTN4	SRPX2	HELLS
CYORF14	MX2	VSIG2
PTPN20B	C20ORF42	KRT6A
LOC400713	TNNI3	EIF5B
MMP9	C12ORF52	CRAT
IFRG15	DEFA1	GRK5
KLK6	SLC6A8	PHACTR2
L1CAM	POSTN	PHF20L1
CDC42SE2	LOC150759	EVI5
KRT34	ADAMTS9	TPM1
FBXO32	PGDS	SMAD5
PLXDC2	DEFB1	PKP2
CCNA1	SLC7A11	ATAD2
ZNF677	PKP2	SLC39A14
TRIM23	WDR72	ANXA3
PEX6	EGR3	AMD1
C12ORF35	ARNTL2	LOC283378
STC1	PMAIP1	DQX1
TP53INP1	TTLL12	TNCRNA
FLJ22531	C1ORF79	SEMA6A
FLJ14213	LOC157381	TMEPAI
ZC3H12C	PCOTH	NRP2
MATN3	CKAP4	SSX2IP
NBEAL1	HPSE	HDAC9
PGM2L1	MTSS1	BAD
PSD3	TM4SF1	PEX13
CDC42BPA	FOSB	TFEB
ALS2CR4	FOXA3	LOC201725
MX1	SERPINE1	DPYSL3
ECHDC3	GMPR	SAMSN1
TPP2	CD93	TMEM106C
PTPRZ1	NTRK2	MMP1
KIAA1644	FETUB	PTPLAD1
FLJ10159	C17ORF28	TMEM167
IL1RL1	KRT24	CD44
KLK8	C12ORF54	CDC42SE2
NSUN6	DQX1	GCNT3
VAV3	ERBB3	RPUSD3
GOLGA8B	GAS2L1	LOC550631
SLC29A2	CSF2RB	CXCL13
SPRR3	LOC400573	SRPX2
SFRP1	TLR4	TOP2A
CNTNAP2	NP	HSD17B12
IGF2	GCNT3	SERF1A
FBXW10	MNT	MX2
TMEM47	ATP10B	ENPP2
SNRPA1	S100A16	LOC130355
MSLN	BFSP1	DNAJC5B
GBP3	SULT2B1	LOC374491
KRT13	FHL1	GRP
IFIT1	PPARGC1A	COL9A2
DMRT2	CCNA1	TOX
SLFN11	LOC25845	WIF1
EPDR1	LOC653193	BMPR1A
OAS1	GPRC5A	EXOC4
LOC386597	TRAF3IP3	KCNMA1
EYA1	UPK1B	TACR1
CEACAM6	LOC441136	FLJ21511
UPK1B	ANLN	LOC200772
LEPREL1	TMEM75	ITPR1
CLEC2B	LRRC8A	SMYD2
LOC149832	PCDHAC1	LOC440993
SNORA68	FKBP1B	TNS3
IFI44	B3GNT6	CD47
MPPE1	FAM110C	SAA4
MSMB	FAM46B	C12ORF46
	SFN	DAPK1
	MKI67	MLLT10
	2019-03-02	C1ORF173
	CST1	LRRK2
	KIAA1904	HLA-DOA
	CTNS	PLUNC
	APOBEC3B	RPRML
	CBR3	CFD
	SNCA	LOC647248
	MLZE	SNRPN
	EMP1	ATP9A
	LOC644320	TGM2
	FHL2	CNTD1
	FCGR3B	IPO11
	FBN2	C6
	FLJ38773	VGLL3
	KIAA1026	TP53BP2
	MUC6	ZBTB20
	CUGBP2	SLAMF7
	SLC25A25	LTF
	VRK3	SCNN1G
	MLKL	MUC5B
	DUSP3	STEAP4
	COBL	FHOD3
	GDF15
	ABHD7
	PSTPIP2
	OSTBETA
	KRT4
	VPS37B
	EHD2
	KLHL18
	CCL3
	SYNJ2
	MFSD2
	EGR2
	MYL9
	CD36
	NMU
	LY96
	CABYR
	HSPA6
	ITGAM
	C1ORF53
	ABCA1
	HPGD
	C6ORF117
	NEK2
	MLCK
	UHRF1
	LMTK3
	UBE2T
	TNNC1
	IGF2BP3
	TXNL5
	PLA2G4A
	CD44
	FPR1
	FCAR
	SCG3
	TTMA
	S100A9
	CPT1A
	HBEGF
	SELL
	TMEM106C
	EDIL3
	DSG3
	LOC284825
	SCARNA2
	HK2
	MLLT4
	LOC126917
	FAM83D
	MNDA
	CCRN4L
	DSCR1
	DPYSL3
	GALE
	ETV1
	CYR61
	APBB1IP
	SDF2L1
	ASB16
	SNORA68
	KIAA1913
	FKBP11
	ANXA1
	MTP18
	ATF7
	LOC402617
	SCNN1A
	IL1RL1
	CORO1C
	LOC692247
	SAMD9
	PNKP
	PLEKHJ1
	TPX2
	FNDC6
	ZNF57
	CREB5
	SLC7A8
	BIRC5
	C15ORF48
	KLF9
	DMRT2
	BCAT1
	BAIAP2
	LOC389023
	CSNK1E
	ITGA6
	TBX1
	LY6G5C
	FAM101B
	ITGA2B
	IGFBPL1
	RPP25
	FLJ36748
	LOC286044
	HLA-DMB
	MGC33302
	IFI27
	FRAS1
	LOC200609
	ATF7IP
	CREBBP
	KIAA0984
	STEAP2
	HLA-DQB1
	GFI1
	EIF4ENIF1
	IFI44
	TRIM55
	HHLA2
	LOC493754
	NAV3
	PAX1
	ARNT
	POLR3B
	PER3
	BTN3A2
	KLF12
	C9ORF72
	NPNT
	LOC643224
	MYH15
	RP3-377H14.5
	CYP4A11
	RNF152
	CCNF
	HLA-F
	SCGB3A1
	ELF5
	C3
	LOC149448
	PCDH17
	GPR126
	LOC647309
	WDR17
	KIF5C
	MAOB
	PNMA2
	ATP13A4
	CIITA
	HLA-DMA
	LOC197135
	FMN2
	PAR5
	PPP1R9A
	TFCP2
	SLC5A1
	ST8SIA4
	ITPR1
	TGFBR3
	CG018
	SLC15A2
	RAI2
	CLEC2D
	TRAC
	SUZ12P
	CHGB
	XCL1
	EPB41L5
	MTCH2
	PELO
	LOC644137
	GVIN1
	ZFP28
	CD1E
	NOTCH2
	IL2RB
	KIAA1450
	IRS2
	HLA-DQA1
	FLJ10781
	MGAT4A
	HLA-DQA1
	SGCE
	PLUNC
	BTN3A3
	RIMS1
	FREM2
	RGN
	HLA-DQB2
	LOC402560
	PART1
	FLJ21511
	ITPR2
	IFI44L
	MUC5B
	SMARCA1
	3.8-1
	LOC150005
	C8ORF54
	LOC399959
	SCNN1G
	NOD27
	KIAA0960
	C9ORF65
	EPB41L2
	ADAM28
	VNN3
	TGM3
	ZNF483
	LOC338667
	P2RY2
	GATM
	HMGA2
	LOC285045
	TTC7B
	SLC39A10
	TNIK
	LOC641941
	LOC644135
	HLA-DPA1
	VEGF
	TLL1
	SCUBE3
	SULF1
	ABCC4
	ATP8A1
	LOC339260
	SKAP1
	GIT2
	NPAS3
	CXCR6
	WWC2
	SERPINB7
	RAB6B
	LRP12
	ASCL1
	TMEM45A
	RGS1
	PTGFR
	CD3D
	TRA@
	SLAMF7
	WNT5A
	KCNMB2
	LOC644943
	KLRC1
	WIF1
	NELL2
	C4A
	FLJ10038
	HLA-DPB2
	ZNF447
	TACR1
	RGS17
	PIP
	KCNA1
	EPB41L3
	FCER1A
	CD8A
	FOXA2
	DPP4
	HEG1
	CA8
	CDH2
	CD3G
	SKIP
	CAPN13
	DOCK10
	GPR171
	CYP2A13
	C3ORF50
	HLA-DRB1
	PLAG1
	B3GALT5
	HLA-DOA
	CCL5
	FLJ30428
	CXCR7
	SLC13A2
	KLRC4
	TRBV21-1
	TMEM46
	TRGC2
	PEG10
	GRP

## Sheet: Genens interesected in differen
GSE13396	[GSE13396] and [GSE64913] and [GSE4302]:	[GSE13396] and [GSE64913]:	[GSE64913] and [GSE4302]:	[GSE13396] and [GSE4302]:
Total DEG	POSTN	CDH2	KRT6A	MGC39900
Upregulated in Asthma	IGF2BP3	WNT5A	PHACTR3	MSRB3
Downregulated in Asthma		FLJ10781	CXCL14	VGLL3
LOC401074		CCNA1	DNAJC12	AKAP12
ADAM19		IL1RL1	FKBP5	CDC42SE2
MGC39900		SPRR3	SERPINB2
COL12A1		KRT13	CLCA1
PRG1		DMRT2	PRR4
SCG5		UPK1B	PHLDB2
ZNF85		SNORA68	TOP2A
MSRB3		IFI44	SRPX2
VGLL3			MX2
GPC4			PKP2
LOC440895			DQX1
AKAP12			GCNT3
CDH2			ATP10B
FAM82B			CST1
MAP1B			HPGD
LOC283537			CD44
MAN1A1			TMEM106C
IL6			DPYSL3
ANPEP			KIAA1913
THBS2			BIRC5
DPYSL4			ITPR1
GRTP1			PLUNC
TCEAL7			FLJ21511
LOC389831			MUC5B
SLIT2			SCNN1G
LOC389830 /// LOC642			SLAMF7
LOC286297			WIF1
POSTN			TACR1
KYNU			HLA-DOA
IGF2BP3			GRP
ELAVL2
WNT5A
MFAP5
LBH /// LOC653743
FLJ10781
SPOCK1
IL24
ST6GALNAC5
TRPC1
YPEL2
CLK4
TMCC1
PTPRK
EIF5A2
HSD17B2
DISP2
SUPT7L
COL5A2
MUC20
HS3ST2
CTNNB1
ZPLD1
LOC400642
AEBP1
C10ORF10
FN1
DKFZP761M1511
TRIM13
NTN4
CYORF14
PTPN20B /// PTPN20A
LOC400713
MMP9
IFRG15
KLK6
L1CAM
CDC42SE2
KRT34
FBXO32
PLXDC2
CCNA1
ZNF677
TRIM23
PEX6
C12ORF35
STC1
TP53INP1
FLJ22531
FLJ14213
ZC3H12C
MATN3
NBEAL1
PGM2L1
PSD3
CDC42BPA
ALS2CR4
MX1
ECHDC3
TPP2
PTPRZ1
KIAA1644
FLJ10159
IL1RL1
KLK8
NSUN6
VAV3
GOLGA8B
SLC29A2
SPRR3
SFRP1
CNTNAP2
IGF2
FBXW10
TMEM47
SNRPA1
MSLN
GBP3
KRT13
IFIT1
DMRT2
SLFN11
EPDR1
OAS1
LOC386597
EYA1
CEACAM6
UPK1B
LEPREL1
CLEC2B
LOC149832
SNORA68
IFI44
MPPE1
MSMB

## Sheet: enriched to DEG
Term	Overlap	P-value	Adjusted P-value	Old P-value	Old Adjusted P-value	Odds Ratio	Combined Score	Genes
SKIN (BULK TISSUE)	15/2316	0.00047066	0.00847188	0	0	2.53988	19.4589	SPRR3;POSTN;SERPINB2;HPGD;DQX1;WNT5A;KRT13;TACR1;CXCL14;SCNN1G;IL1RL1;SRPX2;PHLDB2;CD44;KRT6A
LUNG (BULK TISSUE)	15/2316	0.00047066	0.0101663	0	0	2.53988	19.4589	POSTN;HPGD;GRP;DMRT2;KRT13;IFI44;TACR1;MUC5B;SCNN1G;IL1RL1;SRPX2;WIF1;DPYSL3;HLA-DOA;PHLDB2
GASTRIC TISSUE (BULK)	15/2316	0.00047066	0.0127078	0	0	2.53988	19.4589	SPRR3;POSTN;HPGD;GRP;DQX1;KRT13;TACR1;MUC5B;UPK1B;CST1;SRPX2;WIF1;DPYSL3;PKP2;CLCA1
SMALL INTESTINE (BULK TISSUE)	16/2316	0.000133729	0.0144428	0	0	2.7092	24.1652	SPRR3;POSTN;HPGD;DQX1;KRT13;ATP10B;TACR1;MUC5B;CXCL14;AKAP12;IL1RL1;WIF1;DPYSL3;PKP2;GCNT3;CLCA1
ESOPHAGUS (BULK TISSUE)	15/2316	0.00047066	0.0169438	0	0	2.53988	19.4589	SPRR3;POSTN;SERPINB2;HPGD;DMRT2;DQX1;WNT5A;KRT13;TACR1;MUC5B;SCNN1G;IL1RL1;UPK1B;SRPX2;KRT6A
COLON (BULK TISSUE)	14/2316	0.00151785	0.0204909	0	0	2.37055	15.386	POSTN;HPGD;DMRT2;DQX1;ATP10B;MUC5B;CXCL14;SCNN1G;SRPX2;PKP2;SLAMF7;GCNT3;CLCA1;KRT6A
BASAL CELL	14/2316	0.00151785	0.0234182	0	0	2.37055	15.386	SPRR3;SERPINB2;DMRT2;DQX1;KRT13;MUC5B;SCNN1G;CCNA1;IL1RL1;UPK1B;SRPX2;PKP2;PHLDB2;KRT6A
AMNIOTIC FLUID	15/2316	0.00047066	0.0254156	0	0	2.53988	19.4589	SPRR3;SERPINB2;HPGD;DMRT2;WNT5A;KRT13;MUC5B;SCNN1G;UPK1B;SRPX2;WIF1;IGF2BP3;PHLDB2;KRT6A;VGLL3
TRACHEA (BULK TISSUE)	13/2316	0.00447414	0.0483207	0	0	2.20123	11.9074	SPRR3;PRR4;POSTN;SERPINB2;KRT13;MUC5B;SCNN1G;CCNA1;IL1RL1;UPK1B;SRPX2;PHLDB2;KRT6A
PLACENTA (BULK)	13/2316	0.00447414	0.0536897	0	0	2.20123	11.9074	SPRR3;POSTN;SERPINB2;HPGD;WNT5A;KRT13;AKAP12;IL1RL1;PKP2;IGF2BP3;PHLDB2;KRT6A;VGLL3
WHARTONS JELLY	2316-12-01	0.0120215	0.0811448	0	0	2.0319	8.98316	TOP2A;POSTN;CST1;SRPX2;SERPINB2;CDH2;DMRT2;WNT5A;DPYSL3;MSRB3;IGF2BP3;PHLDB2
VASCULAR SMOOTH MUSCLE	2316-12-01	0.0120215	0.0865545	0	0	2.0319	8.98316	AKAP12;CCNA1;IL1RL1;POSTN;CST1;SRPX2;SERPINB2;CDH2;DMRT2;DPYSL3;KRT13;MSRB3
OMENTUM	2316-12-01	0.0120215	0.0927369	0	0	2.0319	8.98316	AKAP12;IL1RL1;UPK1B;POSTN;SRPX2;SERPINB2;DMRT2;DPYSL3;MSRB3;TACR1;PHLDB2;CXCL14
GASTRIC EPITHELIAL CELL	2316-12-01	0.0120215	0.0998705	0	0	2.0319	8.98316	SPRR3;UPK1B;CST1;SRPX2;SERPINB2;HPGD;DQX1;KRT13;PKP2;GCNT3;MUC5B;KRT6A
FORESKIN FIBROBLAST	2316-12-01	0.0120215	0.108193	0	0	2.0319	8.98316	AKAP12;UPK1B;SRPX2;SERPINB2;CDH2;WNT5A;BIRC5;MSRB3;IGF2BP3;PHLDB2;CD44;VGLL3
FIBROBLAST	2316-12-01	0.0120215	0.118029	0	0	2.0319	8.98316	AKAP12;POSTN;SRPX2;SERPINB2;CDH2;WNT5A;DPYSL3;MSRB3;IGF2BP3;PHLDB2;CD44;VGLL3
RENAL CORTEX	2316-11-01	0.0293541	0.158512	0	0	1.86258	6.57177	TOP2A;AKAP12;SCNN1G;POSTN;HPGD;CDH2;DMRT2;WNT5A;IGF2BP3;TACR1;PHLDB2
MYOBLAST	2316-11-01	0.0293541	0.166855	0	0	1.86258	6.57177	AKAP12;POSTN;SRPX2;CDH2;WNT5A;MSRB3;GCNT3;IGF2BP3;PHLDB2;CD44;VGLL3
KERATINOCYTE	2316-11-01	0.0293541	0.176125	0	0	1.86258	6.57177	SPRR3;CCNA1;IL1RL1;UPK1B;SERPINB2;DQX1;KRT13;PKP2;IGF2BP3;PHLDB2;KRT6A
ILEUM (BULK)	2316-11-01	0.0293541	0.186485	0	0	1.86258	6.57177	POSTN;HPGD;DQX1;PKP2;ATP10B;SLAMF7;GCNT3;CLCA1;HLA-DOA;MUC5B;CXCL14
THYMUS (BULK TISSUE)	2316-10-01	0.0649348	0.250463	0	0	1.69325	4.62998	TOP2A;SCNN1G;SPRR3;POSTN;CST1;HPGD;DMRT2;KRT13;MUC5B;KRT6A
SKELETAL MUSCLE SATELLITE CELL	2316-10-01	0.0649348	0.259739	0	0	1.69325	4.62998	AKAP12;IL1RL1;POSTN;SRPX2;SERPINB2;DMRT2;WNT5A;IGF2BP3;TACR1;VGLL3
OSTEOBLAST	2316-10-01	0.0649348	0.269729	0	0	1.69325	4.62998	AKAP12;POSTN;SRPX2;SERPINB2;CDH2;WNT5A;DPYSL3;MSRB3;PHLDB2;VGLL3
NEURONAL PROGENITOR CELLS	2316-10-01	0.0649348	0.280518	0	0	1.69325	4.62998	TOP2A;AKAP12;SCNN1G;PRR4;UPK1B;CDH2;GRP;DPYSL3;BIRC5;IGF2BP3
NEURONAL EPITHELIUM	2316-10-01	0.0649348	0.292206	0	0	1.69325	4.62998	TOP2A;AKAP12;PRR4;CDH2;DPYSL3;PHACTR3;ATP10B;BIRC5;IGF2BP3;VGLL3
LIVER (BULK TISSUE)	2316-10-01	0.0649348	0.304911	0	0	1.69325	4.62998	AKAP12;IL1RL1;POSTN;SRPX2;HPGD;CDH2;WNT5A;PKP2;IFI44;PHLDB2
HAIR FOLLICLE	2316-10-01	0.0649348	0.318771	0	0	1.69325	4.62998	POSTN;SRPX2;SERPINB2;HPGD;WNT5A;DPYSL3;TACR1;MUC5B;KRT6A;VGLL3
FETAL BRAIN CORTEX	2316-10-01	0.0649348	0.33395	0	0	1.69325	4.62998	AKAP12;SCNN1G;PRR4;CDH2;MX2;DPYSL3;PHACTR3;ATP10B;GCNT3;VGLL3
MIDBRAIN	2316-09-01	0.129722	0.389166	0	0	1.52393	3.11241	TOP2A;UPK1B;CDH2;WNT5A;DPYSL3;ATP10B;BIRC5;GCNT3;CXCL14
LUNG EPITHELIAL CELL	2316-09-01	0.129722	0.400285	0	0	1.52393	3.11241	TOP2A;SPRR3;CCNA1;DMRT2;DQX1;TMEM106C;BIRC5;PHLDB2;KRT6A
GRANULOSA CELL	2316-09-01	0.129722	0.412058	0	0	1.52393	3.11241	CCNA1;IL1RL1;SRPX2;CDH2;WNT5A;DPYSL3;PKP2;ITPR1;FKBP5
ENDOMETRIUM (BULK)	2316-09-01	0.129722	0.424545	0	0	1.52393	3.11241	AKAP12;SCNN1G;POSTN;CST1;SRPX2;GRP;WNT5A;TACR1;VGLL3
DENTATE GRANULE CELL	2316-09-01	0.129722	0.437812	0	0	1.52393	3.11241	SCNN1G;CCNA1;CDH2;GRP;WIF1;DMRT2;PHACTR3;DNAJC12;TACR1
CEREBRAL CORTEX	2316-09-01	0.129722	0.451935	0	0	1.52393	3.11241	AKAP12;CDH2;WIF1;DPYSL3;ITPR1;PHACTR3;DNAJC12;TACR1;CXCL14
BREAST (BULK TISSUE)	2316-09-01	0.129722	0.466999	0	0	1.52393	3.11241	POSTN;SRPX2;GRP;WIF1;DMRT2;TACR1;MUC5B;CXCL14;KRT6A
ASTROCYTE	2316-09-01	0.129722	0.483103	0	0	1.52393	3.11241	AKAP12;CCNA1;POSTN;CST1;SRPX2;CDH2;WNT5A;DPYSL3;IGF2BP3
SPLEEN (BULK TISSUE)	2316-08-01	0.233374	0.514375	0	0	1.3546	1.9711	SPRR3;SRPX2;HPGD;KRT13;IFI44;HLA-DOA;MUC5B;FKBP5
RESPIRATORY SMOOTH MUSCLE	2316-08-01	0.233374	0.525091	0	0	1.3546	1.9711	AKAP12;POSTN;CST1;SRPX2;WNT5A;DPYSL3;MSRB3;VGLL3
PERICARDIUM	2316-08-01	0.233374	0.536263	0	0	1.3546	1.9711	AKAP12;IL1RL1;POSTN;SRPX2;WNT5A;TACR1;PHLDB2;VGLL3
OVARY (BULK TISSUE)	2316-08-01	0.233374	0.547921	0	0	1.3546	1.9711	AKAP12;POSTN;CDH2;GRP;DQX1;WNT5A;KRT13;TACR1
OLIGODENDROCYTE	2316-08-01	0.233374	0.560097	0	0	1.3546	1.9711	TOP2A;CCNA1;CDH2;DMRT2;DPYSL3;IFI44;IGF2BP3;TACR1
KUPFFER CELL	2316-08-01	0.233374	0.572826	0	0	1.3546	1.9711	POSTN;CST1;SRPX2;SERPINB2;CDH2;DPYSL3;MSRB3;PHLDB2
HEART (BULK TISSUE)	2316-08-01	0.233374	0.586148	0	0	1.3546	1.9711	IL1RL1;POSTN;SRPX2;CDH2;PKP2;MSRB3;TACR1;PHLDB2
CINGULATE GYRUS	2316-08-01	0.233374	0.600104	0	0	1.3546	1.9711	AKAP12;CCNA1;IL1RL1;CDH2;WIF1;ITPR1;PHACTR3;CXCL14
CARDIAC MUSCLE FIBER	2316-08-01	0.233374	0.614741	0	0	1.3546	1.9711	POSTN;CDH2;WNT5A;DPYSL3;PKP2;MSRB3;IGF2BP3;PHLDB2
BRAIN (BULK)	2316-08-01	0.233374	0.630109	0	0	1.3546	1.9711	CCNA1;GRP;WIF1;DMRT2;ITPR1;PHACTR3;DNAJC12;TACR1
ALVEOLAR CELL TYPE II	2316-08-01	0.233374	0.646266	0	0	1.3546	1.9711	SCNN1G;SERPINB2;WIF1;DMRT2;KRT13;ATP10B;MUC5B;KRT6A
ADRENAL GLAND	2316-08-01	0.233374	0.663273	0	0	1.3546	1.9711	IL1RL1;POSTN;SRPX2;HPGD;CDH2;ITPR1;DNAJC12;TACR1
ADIPOSE (BULK TISSUE)	2316-08-01	0.233374	0.681199	0	0	1.3546	1.9711	AKAP12;POSTN;SRPX2;DMRT2;MSRB3;TACR1;PHLDB2;CXCL14
VENTRICLE	2316-07-01	0.377357	0.702666	0	0	1.18528	1.15513	IL1RL1;POSTN;SRPX2;CDH2;PKP2;MSRB3;PHLDB2
SUBCUTANEOUS ADIPOSE TISSUE	2316-07-01	0.377357	0.714993	0	0	1.18528	1.15513	POSTN;SRPX2;DMRT2;MSRB3;TACR1;PHLDB2;CXCL14
PREFRONTAL CORTEX	2316-07-01	0.377357	0.727761	0	0	1.18528	1.15513	AKAP12;CDH2;GRP;WIF1;DPYSL3;PHACTR3;ATP10B
PODOCYTE	2316-07-01	0.377357	0.740993	0	0	1.18528	1.15513	AKAP12;UPK1B;POSTN;CDH2;WNT5A;DPYSL3;PHLDB2
PANCREATIC ISLET	2316-07-01	0.377357	0.754715	0	0	1.18528	1.15513	UPK1B;PKP2;ATP10B;DNAJC12;GCNT3;PHLDB2;CDC42SE2
MYOFIBROBLAST	2316-07-01	0.377357	0.768955	0	0	1.18528	1.15513	CST1;SRPX2;WNT5A;DPYSL3;TACR1;CXCL14;CD44
CHONDROCYTE	2316-07-01	0.377357	0.783742	0	0	1.18528	1.15513	AKAP12;IL1RL1;POSTN;SRPX2;WNT5A;MSRB3;TACR1
CD4+ T CELL	2316-07-01	0.377357	0.79911	0	0	1.18528	1.15513	HPGD;ITPR1;SLAMF7;IFI44;CD44;FKBP5;CDC42SE2
THYROID (BULK TISSUE)	2316-06-01	0.548393	0.800357	0	0	1.01595	0.610346	SCNN1G;CCNA1;IL1RL1;POSTN;GRP;ITPR1
SUPERIOR FRONTAL GYRUS	2316-06-01	0.548393	0.811321	0	0	1.01595	0.610346	CCNA1;GRP;WIF1;PHACTR3;TACR1;CXCL14
ALVEOLAR MACROPHAGE	2316-07-01	0.377357	0.815092	0	0	1.18528	1.15513	SERPINB2;HPGD;DQX1;ITPR1;IFI44;HLA-DOA;MUC5B
STROMAL CELL	2316-06-01	0.548393	0.822589	0	0	1.01595	0.610346	POSTN;SRPX2;DMRT2;WNT5A;PHLDB2;VGLL3
SPINAL CORD (BULK)	2316-06-01	0.548393	0.834175	0	0	1.01595	0.610346	AKAP12;CDH2;WIF1;DPYSL3;PHACTR3;TACR1
SPINAL CORD	2316-06-01	0.548393	0.846091	0	0	1.01595	0.610346	AKAP12;CDH2;WIF1;DPYSL3;PHACTR3;TACR1
SENSORY NEURON	2316-06-01	0.548393	0.858354	0	0	1.01595	0.610346	AKAP12;CCNA1;POSTN;CDH2;DQX1;DPYSL3
RETINA	2316-06-01	0.548393	0.870977	0	0	1.01595	0.610346	AKAP12;CDH2;WIF1;DQX1;DPYSL3;TACR1
PREADIPOCYTE	2316-06-01	0.548393	0.883976	0	0	1.01595	0.610346	TOP2A;AKAP12;SRPX2;DMRT2;MUC5B;VGLL3
PLASMACYTOID DENDRITIC CELL	2316-06-01	0.548393	0.89737	0	0	1.01595	0.610346	CCNA1;MX2;ITPR1;SLAMF7;IFI44;HLA-DOA
MOTOR NEURON	2316-06-01	0.548393	0.911175	0	0	1.01595	0.610346	AKAP12;CCNA1;CDH2;DPYSL3;IGF2BP3;TACR1
VALVE	2316-05-01	0.718668	0.924002	0	0	0.846625	0.279687	POSTN;CST1;SRPX2;WIF1;DPYSL3
KIDNEY (BULK TISSUE)	2316-06-01	0.548393	0.925413	0	0	1.01595	0.610346	TOP2A;AKAP12;DMRT2;TMEM106C;DNAJC12;BIRC5
TESTIS (BULK TISSUE)	2316-05-01	0.718668	0.935135	0	0	0.846625	0.279687	AKAP12;CCNA1;SRPX2;CDH2;MUC5B
INTESTINAL EPITHELIAL CELL	2316-06-01	0.548393	0.940102	0	0	1.01595	0.610346	CST1;SRPX2;WNT5A;IGF2BP3;TACR1;CD44
MACROPHAGE	2316-05-01	0.718668	0.946539	0	0	0.846625	0.279687	CCNA1;SERPINB2;SLAMF7;IFI44;CD44
HUMAN EMBRYO	2316-06-01	0.548393	0.955265	0	0	1.01595	0.610346	TOP2A;AKAP12;CDH2;DPYSL3;BIRC5;IGF2BP3
HEPATIC STELLATE CELL	2316-05-01	0.718668	0.958225	0	0	0.846625	0.279687	CCNA1;CST1;SRPX2;SERPINB2;MSRB3
ERYTHROBLAST	2316-05-01	0.718668	0.970202	0	0	0.846625	0.279687	TOP2A;IL1RL1;HPGD;KRT13;BIRC5
FETAL LUNG	2316-06-01	0.548393	0.970925	0	0	1.01595	0.610346	POSTN;SRPX2;WNT5A;DPYSL3;IGF2BP3;TACR1
DORSAL STRIATUM	2316-05-01	0.718668	0.982483	0	0	0.846625	0.279687	CCNA1;WIF1;ITPR1;PHACTR3;TACR1
FETAL BRAIN	2316-06-01	0.548393	0.987107	0	0	1.01595	0.610346	TOP2A;CCNA1;CDH2;DMRT2;DPYSL3;IGF2BP3
SPERM	2316-04-01	0.856862	0.995065	0	0	0.6773	0.104629	CCNA1;GRP;KRT13;MUC5B
CORD BLOOD	2316-05-01	0.718668	0.995079	0	0	0.846625	0.279687	SERPINB2;HPGD;IGF2BP3;HLA-DOA;CD44
NATURAL KILLER CELLS	2316-01-01	0.998133	0.998133	0	0	0.169325	0.000316351	SLAMF7
ATRIUM	2316-06-01	0.548393	1	0	0	1.01595	0.610346	IL1RL1;POSTN;SRPX2;CDH2;PKP2;MSRB3
BLOOD DENDRITIC CELLS	2316-05-01	0.718668	1	0	0	0.846625	0.279687	ATP10B;SLAMF7;HLA-DOA;CD44;CDC42SE2
BONE MARROW (BULK TISSUE)	2316-05-01	0.718668	1	0	0	0.846625	0.279687	MSRB3;CXCL14;CD44;FKBP5;CDC42SE2
CEREBELLUM	2316-05-01	0.718668	1	0	0	0.846625	0.279687	CDH2;WNT5A;DPYSL3;ITPR1;CLCA1
ALPHA CELL	2316-04-01	0.856862	1	0	0	0.6773	0.104629	SCNN1G;DNAJC12;MUC5B;PHLDB2
BETA CELL	2316-04-01	0.856862	1	0	0	0.6773	0.104629	PKP2;DNAJC12;MUC5B;PHLDB2
BLYMPHOCYTE	2316-04-01	0.856862	1	0	0	0.6773	0.104629	SPRR3;DQX1;ITPR1;HLA-DOA
COLONIC MUCOSA	2316-04-01	0.856862	1	0	0	0.6773	0.104629	SCNN1G;ATP10B;GCNT3;CLCA1
DENDRITIC CELL	2316-04-01	0.856862	1	0	0	0.6773	0.104629	SLAMF7;HLA-DOA;CD44;CDC42SE2
GRANULOCYTE	2316-04-01	0.856862	1	0	0	0.6773	0.104629	IL1RL1;MX2;KRT13;MUC5B
PLASMA CELL	2316-04-01	0.856862	1	0	0	0.6773	0.104629	DQX1;PHACTR3;SLAMF7;DNAJC12
SKELETAL MUSCLE (BULK TISSUE)	2316-04-01	0.856862	1	0	0	0.6773	0.104629	SRPX2;DMRT2;DPYSL3;MSRB3
CD19+ B CELLS	2316-03-01	0.944674	1	0	0	0.507975	0.0289118	ITPR1;TACR1;HLA-DOA
CD34+ CELL	2316-03-01	0.944674	1	0	0	0.507975	0.0289118	MSRB3;CD44;FKBP5
HEPATOCYTE	2316-03-01	0.944674	1	0	0	0.507975	0.0289118	SRPX2;HPGD;MUC5B
HUMAN ZYGOTE	2316-03-01	0.944674	1	0	0	0.507975	0.0289118	PHACTR3;GCNT3;IGF2BP3
MAMMARY GLAND	2316-03-01	0.944674	1	0	0	0.507975	0.0289118	DQX1;KRT13;MUC5B
NEUTROPHIL	2316-03-01	0.944674	1	0	0	0.507975	0.0289118	IL1RL1;MX2;KRT13
OOCYTE	2316-03-01	0.944674	1	0	0	0.507975	0.0289118	PHACTR3;GCNT3;IGF2BP3
REGULATORY T CELLS	2316-03-01	0.944674	1	0	0	0.507975	0.0289118	HPGD;IFI44;CDC42SE2
TLYMPHOCYTE	2316-03-01	0.944674	1	0	0	0.507975	0.0289118	SLAMF7;CD44;CDC42SE2
BLASTOCYST	2316-02-01	0.985648	1	0	0	0.33865	0.00489546	HPGD;PKP2
MELANOCYTE	2316-02-01	0.985648	1	0	0	0.33865	0.00489546	AKAP12;MUC5B
MORULA	2316-02-01	0.985648	1	0	0	0.33865	0.00489546	CCNA1;GRP
PERIPHERAL BLOOD	2316-02-01	0.985648	1	0	0	0.33865	0.00489546	SLAMF7;IFI44
BLOOD PBMC	2316-01-01	0.998133	1	0	0	0.169325	0.000316351	HPGD
